# Supplementary material for: Combined Intake of Fish Oil and D-Fagomine Prevents High-Fat High-Sucrose Diet-Induced Prediabetes by Modulating Lipotoxicity and Protein Carbonylation in the Kidney
Source: MDPI journal article supplement (doi:10.3390/antiox12030751), 2023-03-19
Supplement: s1 [file s1]

## Supplementary Materials

**Table S1.** Diet composition.

|                                  | STD <sup>a</sup> -C/-FG | STD <sup>a</sup> - $\omega$ 3/-FG+ $\omega$ 3 | <sup>b</sup> HFHS-C/-FG | <sup>b</sup> HFHS- $\omega$ 3/-FG+ $\omega$ 3 |
|----------------------------------|-------------------------|-----------------------------------------------|-------------------------|-----------------------------------------------|
| Flour (g)                        | 1000 <sup>a</sup>       | 1000 <sup>a</sup>                             | 1000 <sup>b</sup>       | 1000 <sup>b</sup>                             |
| Porcine gelatin (g)              | 25                      | 25                                            | 25                      | 25                                            |
| Soybean lecithin (g)             | 6                       | 6                                             | 22                      | 22                                            |
| Oil (mL)                         | 19 mL soybean           | 19 mL EPA:DHA<br>1:1                          | 24 mL soybean           | 24 mL EPA:DHA<br>1:1                          |
| Protein (% weight)               | 16.4                    | 16.4                                          | 21.7                    | 21.7                                          |
| Fat (% weight)                   | 6.2                     | 6.2                                           | 24.1                    | 24.1                                          |
| Carbohydrates (%<br>weight)      | 46.6                    | 46.6                                          | 45.0                    | 45.0                                          |
| Total energy<br>density (kcal/g) | 3.1                     | 3.1                                           | 4.8                     | 4.8                                           |

<sup>a</sup>Teklad Global 14% Protein Rodent Maintenance Diet (Envigo, IN, USA). <sup>b</sup>TD.08811 45% Kcal Fat Diet (Envigo, IN, USA). STD (standard diet), HFHS (high-fat high-sucrose diet),  $\omega$ 3 (supplementation with fish oil); FG (supplementation with D-Fagomine).

**Table S2.** Fatty acid composition of each diet (chow + supplement). Results are expressed as a percentage of total fatty acids (mg/100mg of Total FA).

| FATTY ACIDS            | STD-C/-FG | STD- $\omega$ 3/-FG+ $\omega$ 3 | HFHS-C/-FG | HFHS- $\omega$ 3/-FG+ $\omega$ 3 |
|------------------------|-----------|---------------------------------|------------|----------------------------------|
| 14:00                  | 0.0       | 0.1                             | 11.5       | 11.6                             |
| 16:00                  | 14.8      | 14.6                            | 32.2       | 32.0                             |
| 16:1 $\omega$ 7        | 0.0       | 0.1                             | 1.7        | 1.7                              |
| 18:00                  | 2.9       | 2.9                             | 13.7       | 13.7                             |
| 18:1 $\omega$ 9        | 20.5      | 20.3                            | 26.4       | 26.2                             |
| 18:1 $\omega$ 7        | 0.0       | 0.0                             | 0.7        | 0.7                              |
| 18:2 $\omega$ 6        | 58.6      | 57.8                            | 9.7        | 8.7                              |
| 20:00                  | n.d.      | 0.0                             | n.d.       | 0.0                              |
| 18:3 $\omega$ 3        | 2.9       | 2.9                             | 1.1        | 1.1                              |
| 20:1 $\omega$ 9        | 0.0       | 0.0                             | 0.0        | 0.0                              |
| 18:4 $\omega$ 3        | 0.0       | 0.0                             | 0.0        | 0.0                              |
| 20:2 $\omega$ 6        | 0.0       | 0.0                             | 0.0        | 0.0                              |
| 20:3 $\omega$ 6        | n.d.      | 0.0                             | n.d.       | 0.0                              |
| 20:4 $\omega$ 6        | 0.0       | 0.0                             | 0.0        | 0.0                              |
| 22:1 $\omega$ 11       | 0.0       | 0.0                             | 0.0        | 0.0                              |
| 22:1 $\omega$ 9        | 0.0       | 0.0                             | 0.0        | 0.0                              |
| 20:4 $\omega$ 3        | 0.0       | 0.0                             | 0.0        | 0.0                              |
| 20:5 $\omega$ 3        | 0.0       | 0.4                             | 0.0        | 0.5                              |
| 24:1 $\omega$ 9        | 0.0       | 0.0                             | 0.0        | 0.0                              |
| 22:5 $\omega$ 3        | 0.0       | 0.1                             | 0.0        | 0.1                              |
| 22:6 $\omega$ 3        | 0.0       | 0.4                             | 0.0        | 0.6                              |
| $\omega$ 3             | 3.3       | 3.2                             | 1.6        | 1.4                              |
| $\omega$ 6             | 58.8      | 58.9                            | 10.4       | 10.6                             |
| $\omega$ 6/ $\omega$ 3 | 17.8      | 18.4                            | 6.5        | 7.6                              |
| SFAs                   | 17.5      | 18.3                            | 59.4       | 60.5                             |
| MUFAs                  | 21.1      | 20.3                            | 29.3       | 28.4                             |
| PUFAs                  | 61.1      | 61.0                            | 10.8       | 10.7                             |
| EPA/DHA                | -         | 1/1                             | -          | 1/1.2                            |

<sup>1</sup> STD (standard diet), HFHS (high-fat high-sucrose diet),  $\omega$ 3 (supplementation with fish oil); FG (supplementation with D-Fagomine); SFAs (saturated fatty acids); MUFAs (monounsaturated fatty acids); PUFAs (polyunsaturated fatty acids); EPA (eicosapentaenoic fatty acid); DHA (docosahexaenoic fatty acid).

**Table S3.** Carbonylated proteins identified by nanoLC-MS/MS in kidney. Carbonylation index calculated for each protein in each diet are also showed. Protein Spot No. refers to the numbered spots in 2D gels shown in Figure S2.

| Spot N° | Protein ID                                                                                         | Gene Name | Avg. Mass | UniProtKB code   | STD-C                      | STD-FG                    | STD- $\omega$ 3            | STD-FG+ $\omega$ 3       | HFHS-C                    | HFHS-FG                   | HFHS- $\omega$ 3          | HFHS-FG+ $\omega$ 3        |
|---------|----------------------------------------------------------------------------------------------------|-----------|-----------|------------------|----------------------------|---------------------------|----------------------------|--------------------------|---------------------------|---------------------------|---------------------------|----------------------------|
| 1       | Phosphatidylethanolamine-binding protein 1<br>OS=Rattus norvegicus OX=10116 GN=Pebp1 PE=1 SV=3     | Pebp1     | 20801     | P31044 PEBP1_RAT | 1.02 <sup>c</sup> (0.01)   | 1.14 <sup>c</sup> (0.14)  | 0.97 <sup>c</sup> (0.17)   | 1.07 <sup>c</sup> (0.25) | 1.51 <sup>ab</sup> (0.01) | 1.58 <sup>a</sup> (0.13)  | 1.11 <sup>c</sup> (0.02)  | 1.17 <sup>bc</sup> (0.06)  |
| 2       | Superoxide dismutase [Mn] mitochondrial OS=Rattus norvegicus OX=10116 GN=Sod2 PE=1 SV=2            | Sod2      | 24674     | P07895 SODM_RAT  | 1.88(0.50)                 | 1.86(0.22)                | 1.94(0.58)                 | 1.85(0.17)               | 2.03(0.44)                | 1.97(0.15)                | 2.12(0.22)                | 2.03(0.12)                 |
| 3       | Glutathione S-transferase alpha-3 OS=Rattus norvegicus OX=10116 GN=Gsta3 PE=1 SV=3                 | Gsta3     | 25319     | P04904 GSTA3_RAT | 0.36(0.10)                 | 0.38(0.21)                | 0.37(0.17)                 | 0.34(0.23)               | 0.38(0.09)                | 0.35(0.13)                | 0.38(0.10)                | 0.37(0.12)                 |
|         | Glutathione S-transferase P OS=Rattus norvegicus OX=10116 GN=Gstp1 PE=1 SV=2                       | Gstp1     | 23439     | P04906 GSTP1_RAT |                            |                           |                            |                          |                           |                           |                           |                            |
|         | Glutathione S-transferase alpha-4 OS=Rattus norvegicus OX=10116 GN=Gsta4 PE=1 SV=2                 | Gsta4     | 25510     | P14942 GSTA4_RAT |                            |                           |                            |                          |                           |                           |                           |                            |
| 4       | Peroxisomal trans-2-enoyl-CoA reductase OS=Rattus norvegicus OX=10116 GN=Pecr PE=2 SV=1            | Pecr      | 32433     | Q9WVK3 PECR_RAT  | 0.71(0.22)                 | 0.73(0.25)                | 0.73(0.31)                 | 0.72(0.34)               | 0.71(0.18)                | 0.59(0.15)                | 0.72(0.15)                | 0.72(0.20)                 |
| 5       | Triosephosphate isomerase OS=Rattus norvegicus OX=10116 GN=Tpi1 PE=1 SV=2                          | Tpi1      | 26849     | P48500 TPIS_RAT  | 0.54 <sup>abc</sup> (0.13) | 0.29 <sup>c</sup> (0.07)  | 0.37 <sup>abc</sup> (0.06) | 0.29 <sup>c</sup> (0.08) | 0.62 <sup>a</sup> (0.16)  | 0.35 <sup>bc</sup> (0.00) | 0.61 <sup>ab</sup> (0.02) | 0.33 <sup>c</sup> (0.11)   |
|         | Electron transfer flavoprotein subunit beta OS=Rattus norvegicus OX=10116 GN=Etfb PE=1 SV=3        | Etfb      | 27687     | Q68FU3 ETFB_RAT  |                            |                           |                            |                          |                           |                           |                           |                            |
| 6       | Enoyl-CoA delta isomerase 1 mitochondrial OS=Rattus norvegicus OX=10116 GN=Eci1 PE=1 SV=1          | Eci1      | 32254     | P23965 ECI1_RAT  | 0.50 <sup>ab</sup> (0.01)  | 0.36 <sup>bc</sup> (0.02) | 0.47 <sup>abc</sup> (0.05) | 0.28 <sup>c</sup> (0.08) | 0.57 <sup>a</sup> (0.08)  | 0.36 <sup>bc</sup> (0.03) | 0.56 <sup>a</sup> (0.13)  | 0.44 <sup>abc</sup> (0.07) |
| 7       | Carbonic anhydrase 2 OS=Rattus norvegicus OX=10116 GN=Ca2 PE=1 SV=2                                | Ca2       | 29114     | P27139 CAH2_RAT  | 0.95 <sup>b</sup> (0.06)   | 0.87 <sup>b</sup> (0.06)  | 0.90 <sup>b</sup> (0.06)   | 0.92 <sup>b</sup> (0.18) | 1.87 <sup>a</sup> (0.29)  | 1.70 <sup>a</sup> (0.29)  | 1.50 <sup>a</sup> (0.19)  | 1.49 <sup>a</sup> (0.14)   |
| 8       | Omega-amidase NIT2 OS=Rattus norvegicus OX=10116 GN=Nit2 PE=1 SV=1                                 | Nit2      | 30701     | Q497B0 NIT2_RAT  | 0.62(0.24)                 | 0.57(0.31)                | 0.61(0.22)                 | 0.56(0.42)               | 0.66(0.35)                | 0.55(0.29)                | 0.67(0.16)                | 0.66(0.04)                 |
| 9       | 3-hydroxyisobutyrate dehydrogenase mitochondrial OS=Rattus norvegicus OX=10116 GN=Hibadh PE=1 SV=3 | Hibadh    | 35303     | P29266 3HIDH_RAT | 0.62(0.24)                 | 0.60(0.34)                | 0.61(0.28)                 | 0.60(0.34)               | 0.60(0.30)                | 0.53(0.25)                | 0.63(0.17)                | 0.62(0.10)                 |
| 10      | Malate dehydrogenase cytoplasmic OS=Rattus norvegicus OX=10116 GN=Mdh1 PE=1 SV=3                   | Mdh1      | 36483     | O88989 MDHC_RAT  | 0.27(0.08)                 | 0.31(0.19)                | 0.43(0.03)                 | 0.32(0.37)               | 0.27(0.06)                | 0.23(0.05)                | 0.28(0.12)                | 0.12(0.04)                 |
| 11      | Actin cytoplasmic 1 OS=Rattus norvegicus OX=10116 GN=Actb PE=1 SV=1                                | Actb      | 41737     | P60711 ACTB_RAT  | 0.19 <sup>b</sup> (0.04)   | 0.22 <sup>ab</sup> (0.09) | 0.21 <sup>ab</sup> (0.14)  | 0.20 <sup>b</sup> (0.08) | 0.58 <sup>a</sup> (0.15)  | 0.56 <sup>ab</sup> (0.20) | 0.37 <sup>ab</sup> (0.22) | 0.26 <sup>ab</sup> (0.04)  |
| 12      | Heat shock cognate 71 kDa protein OS=Rattus                                                        | Hspa8     | 70871     | P63018 HSP7C_RAT | 0.64 <sup>ab</sup> (0.26)  | 0.66 <sup>ab</sup> (0.29) | 0.63 <sup>ab</sup> (0.17)  | 0.56 <sup>b</sup> (0.20) | 1.39 <sup>a</sup> (0.37)  | 1.16 <sup>ab</sup> (0.32) | 0.90 <sup>ab</sup> (0.35) | 0.86 <sup>ab</sup> (0.057) |

|    |                                                                                                                             |         |       |                  |                            |                           |                            |                            |                            |                           |                            |                           |
|----|-----------------------------------------------------------------------------------------------------------------------------|---------|-------|------------------|----------------------------|---------------------------|----------------------------|----------------------------|----------------------------|---------------------------|----------------------------|---------------------------|
| 13 | norvegicus OX=10116 GN=Hspa8 PE=1 SV=1<br>Fructose-bisphosphate aldolase B OS=Rattus norvegicus OX=10116 GN=Aldob PE=1 SV=2 | Aldob   | 39618 | P00884 ALDOB_RAT | 0.31 <sup>cd</sup> (0.03)  | 0.23 <sup>d</sup> (0.05)  | 0.25 <sup>d</sup> (0.06)   | 0.24 <sup>d</sup> (0.07)   | 0.85 <sup>a</sup> (0.13)   | 0.61 <sup>b</sup> (0.01)  | 0.50 <sup>b</sup> (0.02)   | 0.45 <sup>bc</sup> (0.02) |
| 14 | Aspartate aminotransferase mitochondrial OS=Rattus norvegicus OX=10116 GN=Got2 PE=1 SV=2                                    | Got2    | 47314 | P00507 AATM_RAT  | 0.79(0.08)                 | 0.75(0.33)                | 0.75(0.35)                 | 0.71(0.41)                 | 1.17(0.21)                 | 0.97(0.18)                | 0.83(0.19)                 | 0.83(0.09)                |
| 15 | Malate dehydrogenase mitochondrial OS=Rattus norvegicus OX=10116 GN=Mdh2 PE=1 SV=2                                          | Mdh2    | 35684 | P04636 MDHM_RAT  | 0.28(0.16)                 | 0.28(0.23)                | 0.28(0.11)                 | 0.27(0.11)                 | 0.34(0.06)                 | 0.28(0.05)                | 0.39(0.18)                 | 0.39(0.10)                |
| 16 | Glyceraldehyde-3-phosphate dehydrogenase OS=Rattus norvegicus OX=10116 GN=Gapdh PE=1 SV=3                                   | Gapdh   | 35828 | P04797 G3P_RAT   | 0.36 <sup>bc</sup> (0.04)  | 0.18 <sup>d</sup> (0.10)  | 0.25 <sup>cd</sup> (0.03)  | 0.17 <sup>d</sup> (0.04)   | 0.79 <sup>a</sup> (0.01)   | 0.67 <sup>a</sup> (0.01)  | 0.46 <sup>b</sup> (0.08)   | 0.48 <sup>b</sup> (0.07)  |
| 17 | Hydroxyacyl-coenzyme A dehydrogenase mitochondrial OS=Rattus norvegicus OX=10116 GN=Hadh PE=2 SV=1                          | Hadh    | 34448 | Q9WVK7 HCDH_RAT  | 0.46 <sup>abc</sup> (0.17) | 0.25 <sup>c</sup> (0.03)  | 0.32 <sup>bc</sup> (0.07)  | 0.32 <sup>bc</sup> (0.069) | 0.79 <sup>a</sup> (0.09)   | 0.65 <sup>ab</sup> (0.08) | 0.56 <sup>abc</sup> (0.22) | 0.68 <sup>a</sup> (0.16)  |
| 18 | Hydroxyacid oxidase 2 OS=Rattus norvegicus OX=10116 GN=Hao2 PE=1 SV=2                                                       | Hao2    | 39201 | Q07523 HAOX2_RAT | 0.38 <sup>b</sup> (0.07)   | 0.36 <sup>b</sup> (0.15)  | 0.34 <sup>b</sup> (0.10)   | 0.34 <sup>b</sup> (0.087)  | 0.72 <sup>a</sup> (0.09)   | 0.72 <sup>a</sup> (0.09)  | 0.49 <sup>ab</sup> (0.12)  | 0.46 <sup>ab</sup> (0.10) |
| 19 | Aflatoxin B1 aldehyde reductase member 2 OS=Rattus norvegicus OX=10116 GN=Akr7a2 PE=1 SV=2                                  | Akr7a2  | 40675 | Q8CG45 ARK72_RAT | 0.64(0.17)                 | 0.61(0.14)                | 0.65(0.08)                 | 0.57(0.28)                 | 0.69(0.14)                 | 0.65(0.22)                | 0.52(0.01)                 | 0.54(0.07)                |
| 20 | Aldo-keto reductase family 1 member A1 OS=Rattus norvegicus OX=10116 GN=Akr1a1 PE=1 SV=2                                    | Akr1a1  | 36506 | P51635 AK1A1_RAT | 0.45 <sup>b</sup> (0.14)   | 0.42 <sup>b</sup> (0.22)  | 0.21 <sup>b</sup> (0.10)   | 0.39 <sup>b</sup> (0.14)   | 1.35 <sup>a</sup> (0.16)   | 1.30 <sup>a</sup> (0.21)  | 0.49 <sup>b</sup> (0.15)   | 0.45 <sup>b</sup> (0.18)  |
| 21 | Sorbitol dehydrogenase OS=Rattus norvegicus OX=10116 GN=Sord PE=1 SV=4                                                      | Sord    | 38235 | P27867 DHSO_RAT  | 0.51 <sup>bcd</sup> (0.09) | 0.33 <sup>cd</sup> (0.11) | 0.30 <sup>d</sup> (0.01)   | 0.29 <sup>d</sup> (0.01)   | 0.92 <sup>a</sup> (0.10)   | 0.70 <sup>ab</sup> (0.05) | 0.57 <sup>bc</sup> (0.14)  | 0.55 <sup>bc</sup> (0.09) |
| 22 | Aspartate aminotransferase cytoplasmic OS=Rattus norvegicus OX=10116 GN=Got1 PE=1 SV=3                                      | Got1    | 46429 | P13221 AATC_RAT  | 0.45 <sup>c</sup> (0.10)   | 0.44 <sup>c</sup> (0.14)  | 0.70 <sup>bc</sup> (0.01)  | 0.39 <sup>c</sup> (0.18)   | 1.09 <sup>a</sup> (0.22)   | 0.10 <sup>ab</sup> (0.12) | 0.44 <sup>c</sup> (0.05)   | 0.43 <sup>c</sup> (0.07)  |
| 23 | Isocitrate dehydrogenase [NADP] cytoplasmic OS=Rattus norvegicus OX=10116 GN=Idh1 PE=1 SV=1                                 | Idh1    | 46734 | P41562 IDHC_RAT  | 0.26 <sup>c</sup> (0.09)   | 0.24 <sup>c</sup> (0.04)  | 0.55 <sup>b</sup> (0.03)   | 0.26 <sup>c</sup> (0.06)   | 0.98 <sup>a</sup> (0.25)   | 0.46 <sup>bc</sup> (0.00) | 0.68 <sup>b</sup> (0.08)   | 0.56 <sup>b</sup> (0.05)  |
| 24 | Aminoacylase-1A OS=Rattus norvegicus OX=10116 GN=Acy1a PE=1 SV=1                                                            | Acy1a   | 45804 | Q6AYS7 ACY1A_RAT | 0.48 <sup>a</sup> (0.22)   | 0.49 <sup>a</sup> (0.29)  | 0.45 <sup>a</sup> (0.29)   | 0.46 <sup>a</sup> (0.35)   | 0.85 <sup>a</sup> (0.22)   | 0.86 <sup>a</sup> (0.04)  | 0.65 <sup>a</sup> (0.29)   | 0.64 <sup>a</sup> (0.10)  |
| 25 | Aldehyde dehydrogenase mitochondrial OS=Rattus norvegicus OX=10116 GN=Aldh2 PE=1 SV=1                                       | Aldh2   | 56488 | P11884 ALDH2_RAT | 0.48 <sup>a</sup> (0.19)   | 0.42 <sup>a</sup> (0.21)  | 0.45 <sup>a</sup> (0.29)   | 0.42 <sup>a</sup> (0.09)   | 0.71 <sup>a</sup> (0.05)   | 0.58 <sup>a</sup> (0.03)  | 0.70 <sup>a</sup> (0.05)   | 0.53 <sup>a</sup> (0.07)  |
|    | 4-trimethylaminobutyraldehyde dehydrogenase OS=Rattus norvegicus OX=10116 GN=Aldh9a1 PE=1 SV=1                              | Aldh9a1 | 53653 | Q9JLJ3 AL9A1_RAT |                            |                           |                            |                            |                            |                           |                            |                           |
| 26 | Serum albumin OS=Rattus norvegicus OX=10116 GN=Alb PE=1 SV=2                                                                | Alb     | 68731 | P02770 ALBU_RAT  | 0.47 <sup>cd</sup> (0.05)  | 0.39 <sup>d</sup> (0.21)  | 0.66 <sup>abc</sup> (0.06) | 0.60 <sup>bcd</sup> (0.02) | 0.87 <sup>a</sup> (0.02)   | 0.74 <sup>ab</sup> (0.02) | 0.42 <sup>d</sup> (0.02)   | 0.42 <sup>d</sup> (0.07)  |
| 27 | Protein disulfide-isomerase A3 OS=Rattus norvegicus OX=10116 GN=Pdia3 PE=1 SV=2                                             | Pdia3   | 56623 | P11598 PDIA3_RAT | 0.40 <sup>abc</sup> (0.08) | 0.73 <sup>a</sup> (0.07)  | 0.38 <sup>bc</sup> (0.16)  | 0.36 <sup>c</sup> (0.13)   | 0.43 <sup>abc</sup> (0.16) | 0.36 <sup>bc</sup> (0.12) | 0.41 <sup>abc</sup> (0.17) | 0.71 <sup>ab</sup> (0.03) |
|    | Alpha-aminoadipic semialdehyde dehydrogenase OS=Rattus norvegicus OX=10116 GN=Aldh7a1 PE=1                                  | Aldh7a1 | 58749 | Q64057 AL7A1_RAT |                            |                           |                            |                            |                            |                           |                            |                           |

|      |                                                                                                                        |         |       |                  |                            |                           |                            |                          |                           |                           |                            |                            |  |
|------|------------------------------------------------------------------------------------------------------------------------|---------|-------|------------------|----------------------------|---------------------------|----------------------------|--------------------------|---------------------------|---------------------------|----------------------------|----------------------------|--|
| SV=2 |                                                                                                                        |         |       |                  |                            |                           |                            |                          |                           |                           |                            |                            |  |
| 28   | Glutamate dehydrogenase 1 mitochondrial OS=Rattus norvegicus OX=10116 GN=Glud1 PE=1 SV=2                               | Glud1   | 61416 | P10860 DHE3_RAT  | 0.43 <sup>abc</sup> (0.03) | 0.27 <sup>cd</sup> (0.09) | 0.33 <sup>bcd</sup> (0.12) | 0.23 <sup>d</sup> (0.12) | 0.62 <sup>a</sup> (0.04)  | 0.49 <sup>ab</sup> (0.01) | 0.46 <sup>abc</sup> (0.04) | 0.41 <sup>bcd</sup> (0.01) |  |
| 29   | Alanine--glyoxylate aminotransferase 2 mitochondrial OS=Rattus norvegicus OX=10116 GN=Agxt2 PE=1 SV=2                  | Agxt2   | 57201 | Q64565 AG_RAT    | 0.38(0.08)                 | 0.37(0.07)                | 0.41(0.19)                 | 0.40(0.17)               | 0.40(0.08)                | 0.38(0.02)                | 0.41(0.11)                 | 0.40(0.02)                 |  |
| 30   | Retinal dehydrogenase 1 OS=Rattus norvegicus OX=10116 GN=Aldh1a1 PE=1 SV=3                                             | Aldh1a1 | 54459 | P51647 AL1A1_RAT | 0.75 <sup>a</sup> (0.09)   | 0.55 <sup>a</sup> (0.39)  | 0.62 <sup>a</sup> (0.14)   | 0.63 <sup>a</sup> (0.36) | 1.17 <sup>a</sup> (0.21)  | 1.06 <sup>a</sup> (0.03)  | 0.81 <sup>a</sup> (0.08)   | 0.78 <sup>a</sup> (0.22)   |  |
| 31   | Succinyl-CoA:3-ketoacid coenzyme A transferase 1 mitochondrial OS=Rattus norvegicus OX=10116 GN=Oxct1 PE=1 SV=1        | Oxct1   | 56204 | B2GV06 SCOT1_RAT | 0.60 <sup>a</sup> (0.12)   | 0.38 <sup>a</sup> (0.06)  | 0.41 <sup>a</sup> (0.06)   | 0.34 <sup>a</sup> (0.04) | 0.71 <sup>a</sup> (0.25)  | 0.40 <sup>a</sup> (0.04)  | 0.69 <sup>a</sup> (0.20)   | 0.69 <sup>a</sup> (0.15)   |  |
|      | Dihydrolipoyl dehydrogenase mitochondrial OS=Rattus norvegicus OX=10116 GN=Dld PE=1 SV=1                               | Dld     | 54038 | Q6P6R2 DLDH_RAT  |                            |                           |                            |                          |                           |                           |                            |                            |  |
|      | Methylmalonate-semialdehyde dehydrogenase [acylating] mitochondrial OS=Rattus norvegicus OX=10116 GN=Aldh6a1 PE=1 SV=1 | Aldh6a1 | 57808 | Q02253 MMSA_RAT  |                            |                           |                            |                          |                           |                           |                            |                            |  |
| 32   | Catalase OS=Rattus norvegicus OX=10116 GN=Cat PE=1 SV=3                                                                | Cat     | 59757 | P04762 CATA_RAT  | 0.46 <sup>b</sup> (0.16)   | 0.31 <sup>b</sup> (0.16)  | 0.26 <sup>b</sup> (0.09)   | 0.27 <sup>b</sup> (0.08) | 0.89 <sup>a</sup> (0.16)  | 0.60 <sup>ab</sup> (0.09) | 0.51 <sup>b</sup> (0.11)   | 0.51 <sup>b</sup> (0.10)   |  |
|      | Triokinase/FMN cyclase OS=Rattus norvegicus OX=10116 GN=Tkfc PE=1 SV=1                                                 | Tkfc    | 59444 | Q4KLZ6 TKFC_RAT  |                            |                           |                            |                          |                           |                           |                            |                            |  |
| 33   | Acyl-coenzyme A synthetase ACSM2 mitochondrial OS=Rattus norvegicus OX=10116 GN=Acsm2 PE=2 SV=2                        | Acsm2   | 64145 | O70490 ACSM2_RAT | 0.71 <sup>b</sup> (0.25)   | 0.66 <sup>b</sup> (0.26)  | 0.56 <sup>b</sup> (0.49)   | 0.65 <sup>b</sup> (0.40) | 2.06 <sup>a</sup> (0.21)  | 1.40 <sup>ab</sup> (0.25) | 1.04 <sup>b</sup> (0.17)   | 0.75 <sup>b</sup> (0.24)   |  |
|      | Transketolase OS=Rattus norvegicus OX=10116 GN=Tkt PE=1 SV=1                                                           | Tkt     | 67644 | P50137 TKT_RAT   |                            |                           |                            |                          |                           |                           |                            |                            |  |
| 34   | Aconitate hydratase mitochondrial OS=Rattus norvegicus OX=10116 GN=Aco2 PE=1 SV=2                                      | Aco2    | 85433 | Q9ER34 ACON_RAT  | 0.49(0.00)                 | 0.50(0.24)                | 0.51(0.16)                 | 0.53(0.41)               | 0.54(0.13)                | 0.63(0.08)                | 0.53(0.27)                 | 0.54(0.07)                 |  |
| 35   | Serotransferrin OS=Rattus norvegicus OX=10116 GN=Tf PE=1 SV=3                                                          | Tf      | 76395 | P12346 TRFE_RAT  | 0.22 <sup>ab</sup> (0.14)  | 0.19 <sup>ab</sup> (0.04) | 0.21 <sup>ab</sup> (0.10)  | 0.19 <sup>b</sup> (0.04) | 0.35 <sup>ab</sup> (0.08) | 0.45 <sup>a</sup> (0.11)  | 0.35 <sup>ab</sup> (0.09)  | 0.34 <sup>ab</sup> (0.08)  |  |
| 36   | Cytoplasmic aconitate hydratase OS=Rattus norvegicus OX=10116 GN=Aco1 PE=1 SV=1                                        | Aco1    | 98127 | Q63270 ACOC_RAT  | 0.14(0.01)                 | 0.16(0.08)                | 0.18(0.14)                 | 0.16(0.12)               | 0.16(0.03)                | 0.30(0.07)                | 0.15(0.06)                 | 0.16(0.17)                 |  |

<sup>1</sup> Two-way ANOVA analyses were conducted, followed by Tukey HSD's post hoc test. \* p<0.05 significant differences given by the factor "diet" (STD and HFHS); § p<0.05 significant differences given by the factor "supplement" (CONTROL, FG, ω-3, FG+ ω-3). Superscript # indicates significant interaction (p<0.05) between the factors diet and supplement. Means with different superscript indicate significant differences (p<0.05) (analyzed by post hoc Tukey HSD).

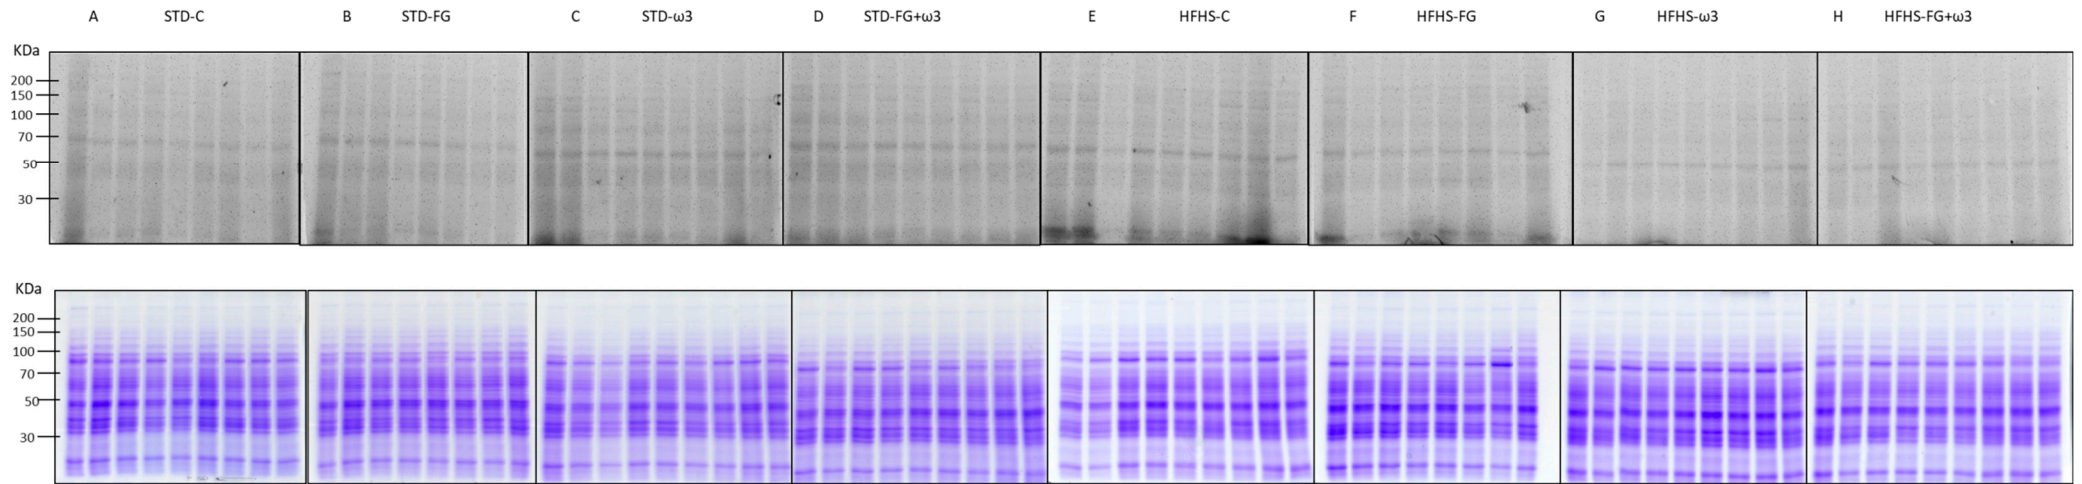

**Figure S1.** Total proteins carbonylation in rat kidneys. Upper panels show representative images of FTSC-label carbonylated proteins resolved in 1D gels from (A) STD-CONTROL, (B) STD-FG, (C) STD- $\omega$ 3, (D) STD-FG+ $\omega$ 3, (E) HFHS-CONTROL, (F) HFHS-FG, (G) HFHS- $\omega$ 3, (H) HFHS-FG+ $\omega$ 3. Lower panels show their corresponding Coomassie stained 1D gels. Images are representatives of three independent labelling experiments performed in triplicates. STD (standard diet), HFHS (high-fat high-sucrose diet),  $\omega$ 3 (supplementation with fish oil); FG (supplementation with D-Fagomine).

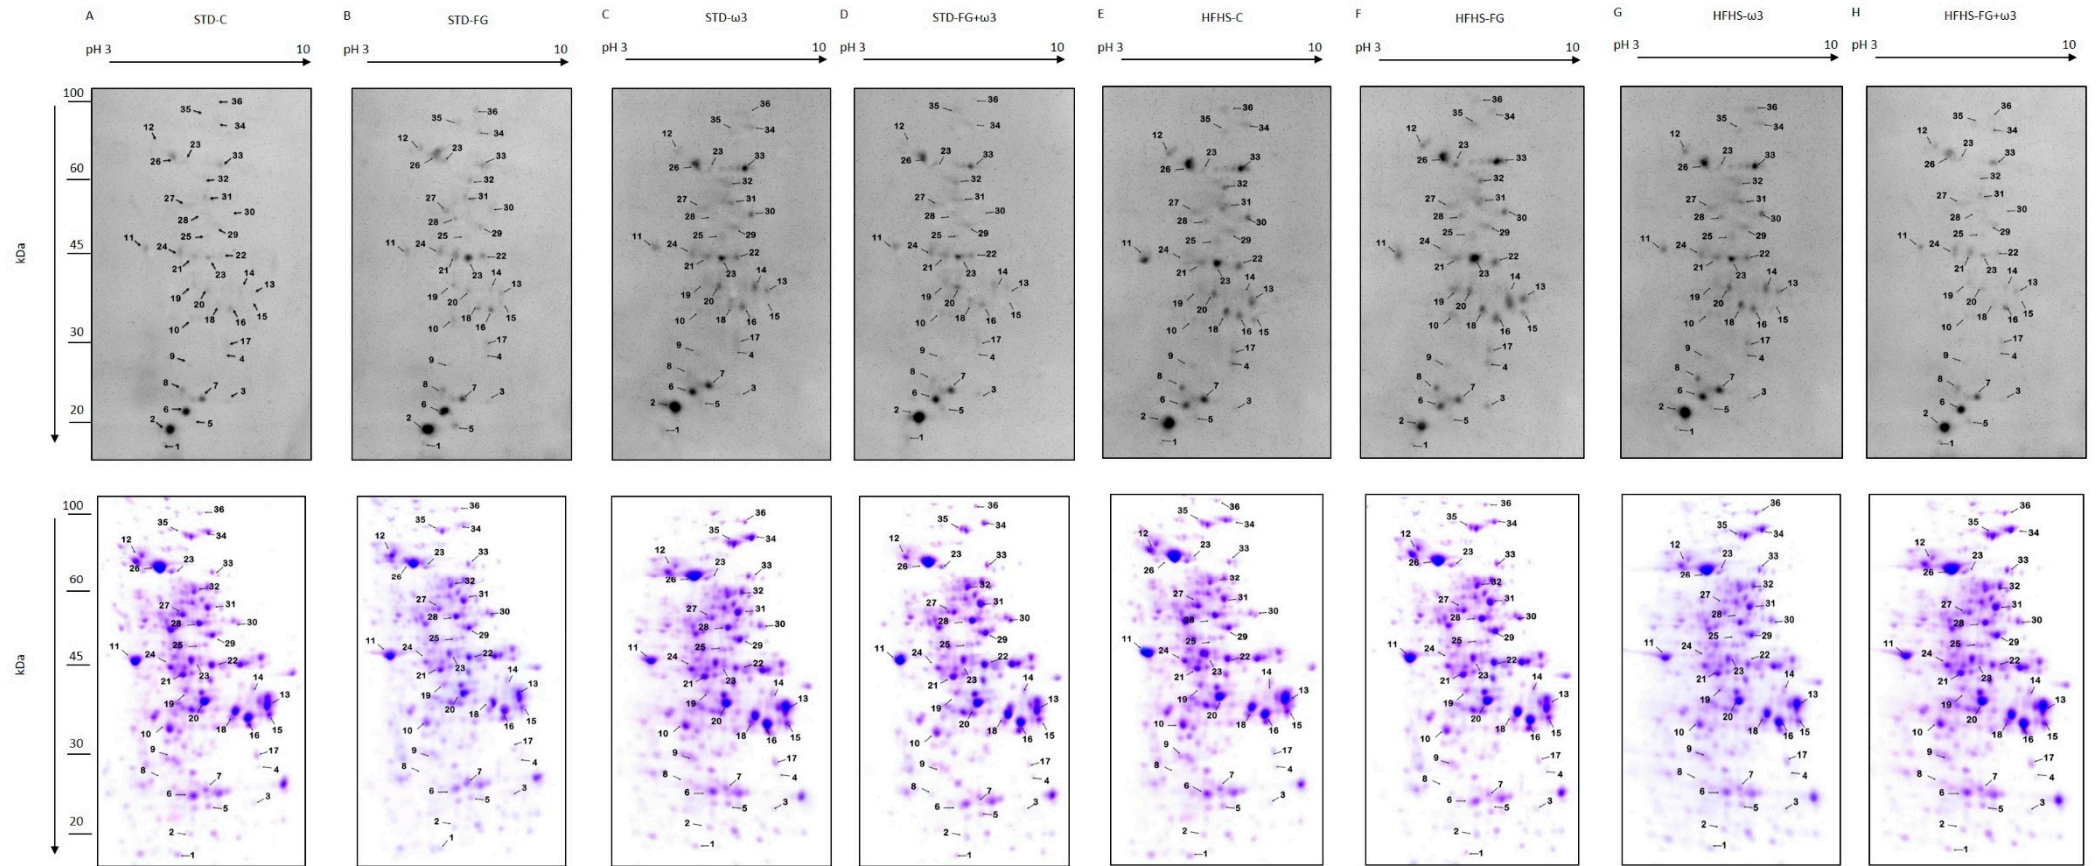

**Figure S2.** Carbonylated proteins identified in rat kidneys. Upper panels show representative images of FTSC-label carbonylated proteins resolved in 2D gels from (A) STD-CONTROL, (B) STD-FG, (C) STD- $\omega$ 3, (D) STD-FG+ $\omega$ 3, (E) HFHS-CONTROL, (F) HFHS-FG, (G) HFHS- $\omega$ 3, (H) HFHS-FG+ $\omega$ 3. Lower panels show their corresponding Coomassie stained 2D gels. Numbered protein spots represent carbonylated proteins confidently identified, and they are listed in Table 5 and Supplementary Table S3. Images are representatives of three independent labelling experiments performed in triplicates. STD (standard diet), HFHS (high-fat high-sucrose diet),  $\omega$ 3 (supplementation with fish oil); FG (supplementation with D-Fagomine).
